# Supplementary material for: Web-Based STI/HIV Testing Services Available for Access in Australia: Systematic Search and Analysis
Source: PubMed Central journal article supplement (PMC10559186; doi:10.2196/45695), 2023-09-22
Supplement: jmir_v25i1e45695_app1.pdf [file jmir_v25i1e45695_app1.pdf]

**Multimedia Appendix 1:** Search combinations using Boolean operators to separate terms related to test service – (online/home/instant/rapid); STIs –(sti/std/chlamydia/gonorrhoea/HIV/syphilis/herpes); and test type –(test/self-test/diagnostic/kit) and the number of services identified from each search using Google.

| Boolean search | Term 1 (AND)                                                   | Term 2 (AND)                                                   | Term 3                                | Service category |               |                          |
|----------------|----------------------------------------------------------------|----------------------------------------------------------------|---------------------------------------|------------------|---------------|--------------------------|
|                |                                                                |                                                                |                                       | Self-testing     | Self-sampling | Self-navigated pathology |
| #1             | “online” OR “home” OR “instant” OR “rapid”                     | “sti” OR “std”                                                 | “test”                                | 5                | 0             | 6                        |
| #2             | “online” OR “home” OR “instant” OR “rapid”                     | “chlamydia” OR “gonorrhoea” OR “HIV” OR “syphilis” OR “herpes” | “test”                                | 4                | 1             | 1                        |
| #3             | “online” OR “home” OR “instant” OR “rapid”                     | “sti” OR “std”                                                 | “test” OR “self-test” OR “diagnostic” | 4                | 1             | 4                        |
| #4             | “online” OR “home” OR “instant” OR “rapid”                     | “chlamydia” OR “gonorrhoea” OR “HIV” OR “syphilis” OR “herpes” | “test” OR “self-test” OR “diagnostic” | 5                | 1             | 3                        |
| #5             | “sti” OR “std”                                                 | “test” OR “self-test” OR “diagnostic”                          | “kit”                                 | 3                | 0             | 1                        |
| #6             | “chlamydia” OR “gonorrhoea” OR “HIV” OR “syphilis” OR “herpes” | “test” OR “self-test” OR “diagnostic”                          | “kit”                                 | 3                | 1             | 2                        |
| <b>Total</b>   |                                                                |                                                                |                                       | <b>8</b>         | <b>2</b>      | <b>7</b>                 |
