# Supplementary material for: Web-Based STI/HIV Testing Services Available for Access in Australia: Systematic Search and Analysis
Source: PubMed Central journal article supplement (PMC10559186; doi:10.2196/45695), 2023-09-22
Supplement: jmir_v25i1e45695_app2.pdf [file jmir_v25i1e45695_app2.pdf]

Multimedia Appendix 2. Summary of *reliability* scores using the HONcode for each available web-based service for STI/HIV testing in Australia in 2022.

| Website Name                                                                                  | InstantScripts | StigmaHealth | SmartHealth | Sydney Sexual Health Center | WA Health (Could I have it?, Get the Facts, Health Sexual) | iMedical | Better2K0w | 13 HEALTH Webtest (QLD health | TESTme   | Buy STD Test Kits | Test Kit Labs | LTlabs   | HIV Test Australia | Test Kit Mart | Atomo Diag0stics | SA MESH  | Rapid (Brisbane) |
|-----------------------------------------------------------------------------------------------|----------------|--------------|-------------|-----------------------------|------------------------------------------------------------|----------|------------|-------------------------------|----------|-------------------|---------------|----------|--------------------|---------------|------------------|----------|------------------|
| <b>Principle 1: Authority</b><br>Give qualifications of authors                               | 1              | 0            | 1           | 1                           | 1                                                          | 0        | 1          | 1                             | 1        | 0                 | 0             | 0        | 0                  | 0             | 1                | 0        | 0                |
| <b>Principle 2: Complementarity</b><br>Information to support, not replace                    | 1              | 1            | 1           | 1                           | 1                                                          | 1        | 1          | 1                             | 1        | 1                 | 1             | 1        | 1                  | 1             | 1                | 1        | 1                |
| <b>Principle 3: Confidentiality</b><br>Respect the privacy of site users                      | 1              | 1            | 1           | 0                           | 1                                                          | 1        | 1          | 1                             | 1        | 1                 | 1             | 1        | 1                  | 1             | 1                | 1        | 1                |
| <b>Principle 4: Attribution</b><br>Cite the sources and dates of medical information          | 0              | 1            | 0           | 1                           | 0                                                          | 0        | 0          | 0                             | 0        | 0                 | 1             | 0        | 0                  | 0             | 1                | 0        | 0                |
| <b>Principle 5: Justifiability</b><br>Justification of claims / balanced and objective claims | 1              | 1            | 1           | 1                           | 1                                                          | 1        | 0          | 1                             | 1        | 0                 | 0             | 0        | 0                  | 0             | 1                | 1        | 1                |
| <b>Principle 6: Transparency</b><br>Accessibility, provide valid contact details              | 1              | 1            | 1           | 1                           | 1                                                          | 1        | 1          | 1                             | 1        | 1                 | 1             | 1        | 1                  | 1             | 1                | 1        | 1                |
| <b>Principle 7: Financial disclosure</b><br>Provide details of funding                        | 0              | 0            | 1           | 1                           | 1                                                          | 0        | 1          | 1                             | 1        | 1                 | 0             | 1        | 0                  | 1             | 1                | 1        | 1                |
| <b>Principle 8: Advertising</b><br>Clearly distinguish advertising from editorial content     | 0              | 0            | 0           | 0                           | 0                                                          | 0        | 0          | 0                             | 0        | 0                 | 0             | 0        | 1                  | 0             | 1                | 0        | 0                |
| <b>Total Score out of 8</b>                                                                   | <b>5</b>       | <b>5</b>     | <b>6</b>    | <b>6</b>                    | <b>6</b>                                                   | <b>4</b> | <b>5</b>   | <b>6</b>                      | <b>6</b> | <b>4</b>          | <b>4</b>      | <b>4</b> | <b>4</b>           | <b>4</b>      | <b>8</b>         | <b>5</b> | <b>5</b>         |
