# Supplementary material for: Web-Based STI/HIV Testing Services Available for Access in Australia: Systematic Search and Analysis
Source: PubMed Central journal article supplement (PMC10559186; doi:10.2196/45695), 2023-09-22
Supplement: jmir_v25i1e45695_app3.pdf [file jmir_v25i1e45695_app3.pdf]

**Multimedia Appendix 3.** Sexual health clinician weighted scorecard developed based on the Australian STI Management Guidelines, TGA Guidelines, reviews of web-based STI/HIV testing services available overseas and UK standards to assess *quality* of available web-based services for HIV/STI testing in Australia in 2022.

| Provider                     |                                                                                                                                              |                  |        |                 |                                                                                                                                                                                                                                                                                                                                              |
|------------------------------|----------------------------------------------------------------------------------------------------------------------------------------------|------------------|--------|-----------------|----------------------------------------------------------------------------------------------------------------------------------------------------------------------------------------------------------------------------------------------------------------------------------------------------------------------------------------------|
| Indicator                    | Explanation                                                                                                                                  | Answer           | Rubric | Clinical Weight | Notes                                                                                                                                                                                                                                                                                                                                        |
| <b>Pre-test</b>              |                                                                                                                                              |                  |        |                 |                                                                                                                                                                                                                                                                                                                                              |
| Information                  | Does the website give accurate <b>health promotional</b> information about the STIs?                                                         | Yes              | 1      | 3               |                                                                                                                                                                                                                                                                                                                                              |
|                              |                                                                                                                                              | No               | 0      |                 |                                                                                                                                                                                                                                                                                                                                              |
| Patient History              | Did the provider collect a <b>patient history</b> pertinent to the STI test?                                                                 | Adequate         | 1      | 5               | This can include any question that assesses the individual's risk for infection. Websites were deemed 'Adequate' if they asked a question about men who have sex with men and a question about Aboriginal and Torres Strait Islander. 'Inadequate' means that the website asked questions, but not specifically about MSM and Aboriginality. |
|                              |                                                                                                                                              | Inadequate       | 0.5    |                 |                                                                                                                                                                                                                                                                                                                                              |
|                              |                                                                                                                                              | No               | 0      |                 |                                                                                                                                                                                                                                                                                                                                              |
| Testing at Appropriate Sites | Does the provider discuss <b>infection at different sites (oral, anal, vaginal, etc.)</b> and/or provide appropriate testing at these sites? | Both             | 1      | 5               | Some providers may only provide information about infection/testing at a different site, but not offer specimen collection at these sites.                                                                                                                                                                                                   |
|                              |                                                                                                                                              | Information only | 0.5    |                 |                                                                                                                                                                                                                                                                                                                                              |
|                              |                                                                                                                                              | Neither          | 0      |                 |                                                                                                                                                                                                                                                                                                                                              |
| <b>Testing</b>               |                                                                                                                                              |                  |        |                 |                                                                                                                                                                                                                                                                                                                                              |
| Tests Available              | Are all tests recommended for a <b>routine STI checkup</b> (chlamydia, gonorrhoea, syphilis, and HIV) available on the web-based platform?   | All              | 1      | 5               | Some web-based services may only provide one or some of the recommended tests, while others will provide all 4.                                                                                                                                                                                                                              |
|                              |                                                                                                                                              | Some             | 0.5    |                 |                                                                                                                                                                                                                                                                                                                                              |
|                              |                                                                                                                                              | Only one         | 0.25   |                 |                                                                                                                                                                                                                                                                                                                                              |
|                              |                                                                                                                                              | None             | 0      |                 |                                                                                                                                                                                                                                                                                                                                              |
|                              |                                                                                                                                              | Yes              | 1      | 4               |                                                                                                                                                                                                                                                                                                                                              |

|                      |                                                                                                                       |          |     |   |                                                                                                                                                                                                                                                                                                                                                                                          |
|----------------------|-----------------------------------------------------------------------------------------------------------------------|----------|-----|---|------------------------------------------------------------------------------------------------------------------------------------------------------------------------------------------------------------------------------------------------------------------------------------------------------------------------------------------------------------------------------------------|
| Unnecessary Testing  | Does the provider only promote testing for STIs recommended by <b>Australian STI management guidelines</b> ?          | No       | 0   |   | Some services may promote routine testing for STIs that are not currently recommended for routine testing (e.g. herpes, etc.)                                                                                                                                                                                                                                                            |
| Test TGA Approval    | Is the test offered <b>Therapeutic Goods Administration (TGA)</b> approved?                                           | Yes      | 1   | 5 | We will assume that any service that requires the use of a laboratory to analyze a sample is TGA approved.                                                                                                                                                                                                                                                                               |
|                      |                                                                                                                       | No       | 0   |   |                                                                                                                                                                                                                                                                                                                                                                                          |
| Test Type            | Does the <b>test type</b> offered reflect those recommended by the Australian STI management guidelines (NAAT, etc.)? | Yes      | 1   | 4 | We will assume that any service that requires the use of a laboratory to analyze a sample meets the guidelines.                                                                                                                                                                                                                                                                          |
|                      |                                                                                                                       | No       | 0   |   |                                                                                                                                                                                                                                                                                                                                                                                          |
| <b>Usability</b>     |                                                                                                                       |          |     |   |                                                                                                                                                                                                                                                                                                                                                                                          |
| Instructions         | Are their <b>instructions</b> provided for the test or process?                                                       | Yes      | 1   | 4 | This would vary depending on test type;<br>Self-navigated pathology- the process for obtaining a pathology form to take to a pathology and then getting result<br>Self-sampling- the process of receiving the testing kit, instructions to self-collect samples, sending kit back to lab and then getting result<br>Self-testing- instructions on how to use point of care tests at home |
|                      |                                                                                                                       | No       | 0   |   |                                                                                                                                                                                                                                                                                                                                                                                          |
| Support Contact      | Is there an option to <b>contact support</b> for further questions?                                                   | Yes      | 1   | 3 | If yes, the contact options should be provided in the comments.                                                                                                                                                                                                                                                                                                                          |
|                      |                                                                                                                       | No       | 0   |   |                                                                                                                                                                                                                                                                                                                                                                                          |
| <b>Follow-up</b>     |                                                                                                                       |          |     |   |                                                                                                                                                                                                                                                                                                                                                                                          |
| Result Communication | How was the result provided?<br>Provider always initiated                                                             | Provider | 1   | 4 | Two methods (1) Provider initiated would involve active notification from a medical professional to the patient (phone call, SMS, email, etc.).<br>(2) Patient initiated would involve the patient actively                                                                                                                                                                              |
|                      |                                                                                                                       | Patient  | 0.5 |   |                                                                                                                                                                                                                                                                                                                                                                                          |

|                            |                                                                                                                                 |                         |      |          |                                                                                                                                                                                                                                                                                                                                                                                  |
|----------------------------|---------------------------------------------------------------------------------------------------------------------------------|-------------------------|------|----------|----------------------------------------------------------------------------------------------------------------------------------------------------------------------------------------------------------------------------------------------------------------------------------------------------------------------------------------------------------------------------------|
|                            | OR<br>Patient initiated                                                                                                         | No result               | 0    |          | contacting the provider to receive the result (portal login, call, etc.) OR the patient interpreting their own test result.                                                                                                                                                                                                                                                      |
| Result Interpretation      | Is the <b>result interpretation</b> easy?                                                                                       | Yes                     | 1    | <b>3</b> | The result was considered somewhat easy to interpret if it had to be self-interpreted by the individual.                                                                                                                                                                                                                                                                         |
|                            |                                                                                                                                 | Somewhat                | 0.5  |          |                                                                                                                                                                                                                                                                                                                                                                                  |
|                            |                                                                                                                                 | No                      | 0    |          |                                                                                                                                                                                                                                                                                                                                                                                  |
| Treatment                  | Is information and/or referral for <b>treatment</b> provided for a positive test?                                               | Provided TX             | 1    | <b>5</b> | There are different levels of what a website provides related to treatment with each building on the previous. (0.25) Websites only offered information on treatment; (0.5) provided a referral to see a GP to receive treatment; (0.75) provided a prescription for the patient to get treatment from a pharmacy; (1) filled the prescription and sent treatment to the person. |
|                            |                                                                                                                                 | Provided RX             | 0.75 |          |                                                                                                                                                                                                                                                                                                                                                                                  |
|                            |                                                                                                                                 | Referral                | 0.5  |          |                                                                                                                                                                                                                                                                                                                                                                                  |
|                            |                                                                                                                                 | Information             | 0.25 |          |                                                                                                                                                                                                                                                                                                                                                                                  |
|                            |                                                                                                                                 | Nothing                 | 0    |          |                                                                                                                                                                                                                                                                                                                                                                                  |
| Partner Notification       | Is there information on <b>partner notification</b> for positive tests? Are services provided?                                  | Services                | 1    | <b>4</b> | The website could offer their own notification service, provide information or links to other notification services, or offer nothing on partner services.                                                                                                                                                                                                                       |
|                            |                                                                                                                                 | Information, no service | 0.5  |          |                                                                                                                                                                                                                                                                                                                                                                                  |
|                            |                                                                                                                                 | None                    | 0    |          |                                                                                                                                                                                                                                                                                                                                                                                  |
| Disease Notification       | Does the provider follow government <b>notifiable disease</b> guidelines and report positive results to the appropriate entity? | Yes                     | 1    | <b>4</b> | We will assume that any service that requires the use of a laboratory to analyze a sample, will also report diseases based on guidelines.                                                                                                                                                                                                                                        |
|                            |                                                                                                                                 | No                      | 0    |          |                                                                                                                                                                                                                                                                                                                                                                                  |
| <b>Total Quality Score</b> |                                                                                                                                 |                         |      |          | <b>Max Score= 58</b>                                                                                                                                                                                                                                                                                                                                                             |
