# Supplementary material for: Web-Based STI/HIV Testing Services Available for Access in Australia: Systematic Search and Analysis
Source: PubMed Central journal article supplement (PMC10559186; doi:10.2196/45695), 2023-09-22
Supplement: jmir_v25i1e45695_app4.pdf [file jmir_v25i1e45695_app4.pdf]

Multimedia Appendix 4: Detailed *quality* scores for each available web-based STI/HIV testing service in Australia in 2022.

| Indication                   | Explanation                                                                          | InstantScripts | StigmaHealth | SmartHealth | Sydney Sexual Health Center | WA Health | iMedical | Better2K0w | 13 HEALTH Webtest (QLD health) | TESTmeor | Buy STD Test Kits | Test Kit Labs | LT Labs | HIV Test Australia | Test Kit Mart | Atomo DiagOstics | SA MESH | Rapid (Brisbane) |
|------------------------------|--------------------------------------------------------------------------------------|----------------|--------------|-------------|-----------------------------|-----------|----------|------------|--------------------------------|----------|-------------------|---------------|---------|--------------------|---------------|------------------|---------|------------------|
| Information                  | Does the website give accurate <b>health promotional</b> information about the STIs? | 3              | 3            | 3           | 3                           | 3         | 3        | 3          | 3                              | 3        | 3                 | 3             | 3       | 3                  | 3             | 0                | 3       | 3                |
| Patient History              | Did the provider collect a <b>patient history</b> pertinent to the STI test?         | 2.5            | 2.5          | 0           | 5                           | 2.5       | 0        | 2.5        | 2.5                            | 0        | 0                 | 0             | 0       | 0                  | 0             | 0                | 2.5     | 5                |
| Testing at Appropriate Sites | Does the provider discuss <b>infection at different sites (oral, anal,</b>           | 5              | 5            | 0           | 5                           | 2.5       | 2.5      | 5          | 2.5                            | 0        | 2.5               | 0             | 0       | 0                  | 0             | 0                | 2.5     | 0                |

|                     |                                                                                                                                           |   |   |   |   |     |   |   |     |     |   |     |   |   |   |      |      |      |
|---------------------|-------------------------------------------------------------------------------------------------------------------------------------------|---|---|---|---|-----|---|---|-----|-----|---|-----|---|---|---|------|------|------|
|                     | <b>vaginal, etc.)</b><br>and/or provide appropriate testing at these sites?                                                               |   |   |   |   |     |   |   |     |     |   |     |   |   |   |      |      |      |
| Tests Available     | Are all tests recommended for a <b>routine STI checkup</b> (chlamydia, gonorrhea, syphilis, and HIV) available on the web-based platform? | 5 | 5 | 5 | 5 | 2.5 | 5 | 5 | 2.5 | 2.5 | 5 | 2.5 | 5 | 5 | 5 | 1.25 | 1.25 | 1.25 |
| Unnecessary Testing | Does the provider only promote testing for STIs recommended by <b>Australian STI management guidelines</b> ?                              | 0 | 0 | 0 | 4 | 4   | 0 | 0 | 4   | 4   | 0 | 0   | 0 | 0 | 0 | 4    | 4    | 4    |
| Test TGA Approval   | Is the test offered <b>Therapeutic Goods Administration (TGA)</b> approved?                                                               | 5 | 5 | 5 | 5 | 5   | 5 | 5 | 5   | 5   | 0 | 0   | 0 | 0 | 0 | 5    | 5    | 5    |
| Test Type           | Does the <b>test type</b> offered                                                                                                         | 4 | 4 | 4 | 4 | 4   | 4 | 4 | 4   | 4   | 0 | 0   | 0 | 0 | 0 | 4    | 4    | 4    |

|                       |                                                                                     |      |      |     |      |      |   |      |     |   |      |     |      |      |      |      |     |      |
|-----------------------|-------------------------------------------------------------------------------------|------|------|-----|------|------|---|------|-----|---|------|-----|------|------|------|------|-----|------|
|                       | reflect those recommended by the Australian STI management guidelines (NAAT, etc.)? |      |      |     |      |      |   |      |     |   |      |     |      |      |      |      |     |      |
| Instructions          | Are their <b>instructions</b> provided for the test or process?                     | 4    | 4    | 4   | 4    | 4    | 4 | 4    | 4   | 4 | 4    | 4   | 4    | 4    | 4    | 4    | 4   | 4    |
| Support Contact       | Is there an option to <b>contact support</b> for further questions?                 | 3    | 3    | 3   | 3    | 3    | 3 | 3    | 3   | 3 | 3    | 3   | 3    | 3    | 3    | 3    | 3   | 3    |
| Result Communication  | How was the result provided? Provider always initiated or patient initiated?        | 4    | 4    | 4   | 4    | 4    | 4 | 4    | 4   | 4 | 0    | 0   | 0    | 0    | 0    | 0    | 0   | 0    |
| Result Interpretation | Is the <b>result interpretation</b> easy?                                           | 3    | 3    | 3   | 3    | 3    | 3 | 3    | 3   | 3 | 0    | 1.5 | 1.5  | 0    | 1.5  | 1.5  | 3   | 1.5  |
| Treatment             | Is information and/or referral for <b>treatment</b> provided for a positive test?   | 3.75 | 3.75 | 2.5 | 1.25 | 1.25 | 0 | 1.25 | 2.5 | 5 | 1.25 | 0   | 1.25 | 1.25 | 1.25 | 1.25 | 2.5 | 1.25 |

|                                 |                                                                                                                                 |       |       |      |       |       |      |       |    |      |       |    |       |       |       |    |       |    |
|---------------------------------|---------------------------------------------------------------------------------------------------------------------------------|-------|-------|------|-------|-------|------|-------|----|------|-------|----|-------|-------|-------|----|-------|----|
| Partner Notification            | Is there information on <b>partner notification</b> for positive tests? Are services provided?                                  | 0     | 2     | 2    | 4     | 2     | 0    | 0     | 2  | 2    | 0     | 0  | 0     | 0     | 0     | 0  | 2     | 0  |
| Disease Notification            | Does the provider follow government <b>notifiable disease</b> guidelines and report positive results to the appropriate entity? | 4     | 4     | 4    | 4     | 4     | 4    | 4     | 4  | 4    | 0     | 0  | 0     | 0     | 0     | 0  | 0     | 4  |
| <b>Total Quality Score (58)</b> |                                                                                                                                 | 46.25 | 48.25 | 39.5 | 54.25 | 44.75 | 37.5 | 43.75 | 46 | 43.5 | 18.75 | 14 | 17.75 | 16.25 | 17.25 | 24 | 36.75 | 36 |
